# Supplementary material for: The potential impact of case-area targeted interventions in response to cholera outbreaks: A modeling study
Source: PubMed Central journal article supplement (PMC5828347; doi:10.1371/journal.pmed.1002509), 2018-02-27
Supplement: pmed.1002509.s019.pdf [file pmed.1002509.s019.pdf]

No long-distance transmission

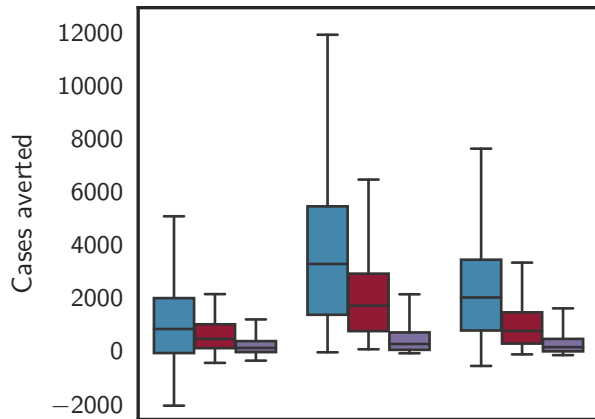

5% long-distance transmission

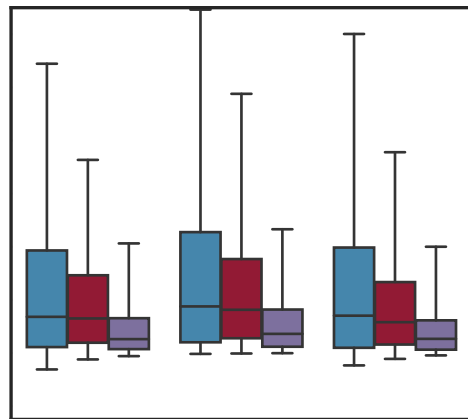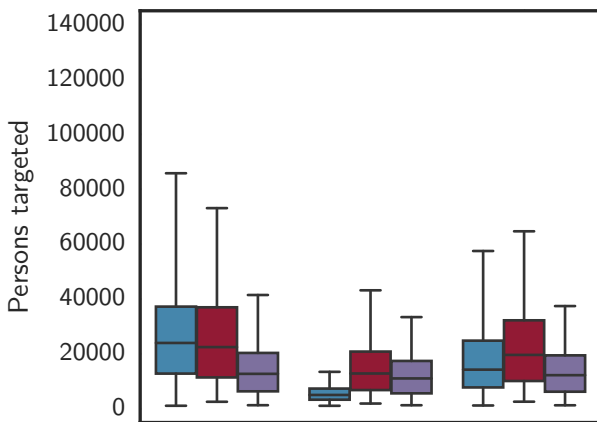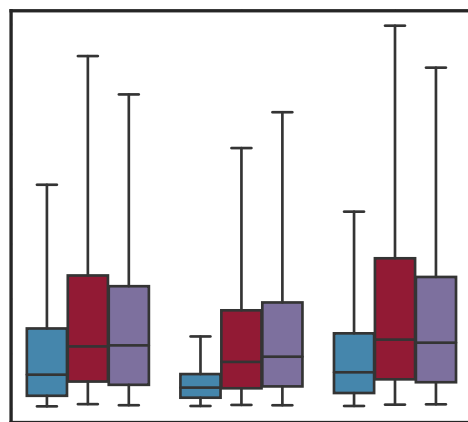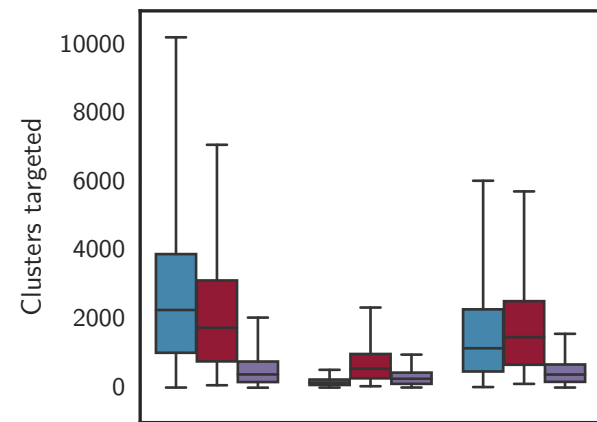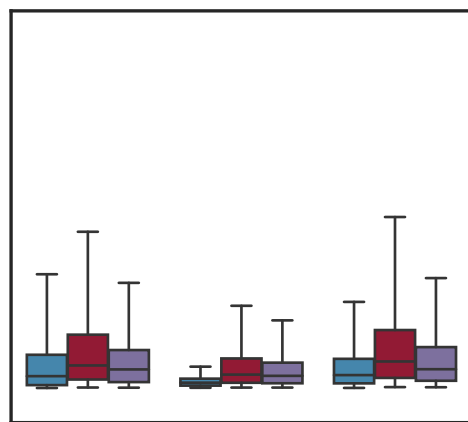

Antibiotics

OCV

POUWT

Antibiotics

OCV

POUWT

early

peak

late
