# Supplementary material for: The potential impact of case-area targeted interventions in response to cholera outbreaks: A modeling study
Source: PubMed Central journal article supplement (PMC5828347; doi:10.1371/journal.pmed.1002509), 2018-02-27
Supplement: pmed.1002509.s024.pdf [file pmed.1002509.s024.pdf]

|    | Antibiotics* | Antibiotics** | OCV | POUWT | Clusters 100m | Clusters 70m | Clusters 45m | Clusters 30m | Clusters 15m | Random | Entire population | By district | Early | Peak | Late | Clusters targeted | People targeted      | Cases averted     |
|----|--------------|---------------|-----|-------|---------------|--------------|--------------|--------------|--------------|--------|-------------------|-------------|-------|------|------|-------------------|----------------------|-------------------|
| 1  | x            |               |     |       | x             |              |              |              |              |        |                   |             | x     |      |      | 2282 [21, 10229]  | 23987 [1109, 85818]  | 905 [-1984, 5157] |
| 2  | x            |               |     |       | x             |              |              |              |              |        |                   |             |       | x    |      | 1763 [87, 7098]   | 22477 [2539, 73165]  | 532 [-371, 2220]  |
| 3  | x            |               |     |       | x             |              |              |              |              |        |                   |             |       |      | x    | 404 [18, 2072]    | 12735 [1288, 41564]  | 191 [-299, 1267]  |
| 4  |              | x             |     |       | x             |              |              |              |              |        |                   |             | x     |      |      | 1179 [24, 6671]   | 32027 [1501, 140503] | 2065 [-506, 7300] |
| 5  |              | x             |     |       | x             |              |              |              |              |        |                   |             |       | x    |      | 1289 [62, 5573]   | 34596 [2479, 126474] | 1034 [28, 3698]   |
| 6  |              | x             |     |       | x             |              |              |              |              |        |                   |             |       |      | x    | 301 [17, 1308]    | 14760 [1248, 51802]  | 302 [-24, 2000]   |
| 7  |              |               | x   |       | x             |              |              |              |              |        |                   |             | x     |      |      | 166 [20, 539]     | 5044 [1083, 13489]   | 3353 [26, 12006]  |
| 8  |              |               | x   |       | x             |              |              |              |              |        |                   |             |       | x    |      | 571 [59, 2360]    | 12862 [1915, 43188]  | 1784 [139, 6539]  |
| 9  |              |               | x   |       | x             |              |              |              |              |        |                   |             |       |      | x    | 278 [23, 982]     | 11064 [1291, 33596]  | 338 [-9, 2227]    |
| 10 |              |               |     | x     | x             |              |              |              |              |        |                   |             | x     |      |      | 1167 [36, 6053]   | 14263 [1200, 57750]  | 2091 [-494, 7697] |
| 11 |              |               |     | x     | x             |              |              |              |              |        |                   |             |       | x    |      | 1491 [128, 5747]  | 19632 [2590, 64664]  | 833 [-51, 3404]   |
| 12 |              |               |     | x     | x             |              |              |              |              |        |                   |             |       |      | x    | 401 [20, 1590]    | 12249 [1267, 37495]  | 221 [-80, 1683]   |
| 13 | x            |               |     |       |               | x            |              |              |              |        |                   |             | x     |      |      | 1371 [18, 6635]   | 13962 [783, 51868]   | 1917 [-738, 7021] |
| 14 | x            |               |     |       |               | x            |              |              |              |        |                   |             |       | x    |      | 1363 [76, 5760]   | 16024 [1425, 56816]  | 943 [-15, 3499]   |
| 15 | x            |               |     |       |               | x            |              |              |              |        |                   |             |       |      | x    | 378 [19, 1870]    | 9022 [775, 29234]    | 213 [-159, 1398]  |
| 16 |              | x             |     |       |               | x            |              |              |              |        |                   |             | x     |      |      | 985 [20, 5716]    | 19376 [916, 93989]   | 2285 [-291, 8244] |
| 17 |              | x             |     |       |               | x            |              |              |              |        |                   |             |       | x    |      | 1207 [79, 5075]   | 24803 [2100, 88682]  | 1162 [24, 3936]   |
| 18 |              | x             |     |       |               | x            |              |              |              |        |                   |             |       |      | x    | 321 [20, 1520]    | 10456 [873, 41415]   | 284 [-51, 1785]   |
| 19 |              |               | x   |       |               | x            |              |              |              |        |                   |             | x     |      |      | 314 [33, 1855]    | 5474 [1013, 22979]   | 2986 [0, 11090]   |
| 20 |              |               | x   |       |               | x            |              |              |              |        |                   |             |       | x    |      | 930 [86, 4212]    | 13707 [1738, 48912]  | 1337 [87, 5333]   |
| 21 |              |               | x   |       |               | x            |              |              |              |        |                   |             |       |      | x    | 300 [24, 1056]    | 8137 [875, 25731]    | 315 [-11, 2096]   |
| 22 |              |               |     | x     |               | x            |              |              |              |        |                   |             | x     |      |      | 1231 [39, 6489]   | 12723 [1047, 53439]  | 2037 [-671, 7231] |
| 23 |              |               |     | x     |               | x            |              |              |              |        |                   |             |       | x    |      | 1442 [104, 5709]  | 16447 [1895, 55113]  | 813 [-24, 3413]   |
| 24 |              |               |     | x     |               | x            |              |              |              |        |                   |             |       |      | x    | 403 [28, 1737]    | 8882 [897, 29411]    | 197 [-91, 1615]   |
| 25 | x            |               |     |       |               |              | x            |              |              |        |                   |             | x     |      |      | 309 [22, 1836]    | 3633 [427, 16925]    | 3028 [2, 10753]   |
| 26 | x            |               |     |       |               |              | x            |              |              |        |                   |             |       | x    |      | 738 [50, 3218]    | 8289 [841, 31695]    | 1677 [122, 5727]  |

|    | Antibiotics* | Antibiotics** | OCV | POUWT | Clusters 100m | Clusters 70m | Clusters 45m | Clusters 30m | Clusters 15m | Random | Entire population | By district | Early | Peak | Late | Clusters targeted | People targeted     | Cases averted      |
|----|--------------|---------------|-----|-------|---------------|--------------|--------------|--------------|--------------|--------|-------------------|-------------|-------|------|------|-------------------|---------------------|--------------------|
| 27 | x            |               |     |       |               |              | x            |              |              |        |                   |             |       |      | x    | 277 [17, 1104]    | 4805 [428, 16353]   | 339 [-9, 2116]     |
| 28 |              | x             |     |       |               |              | x            |              |              |        |                   |             | x     |      |      | 285 [21, 1775]    | 4236 [455, 22493]   | 3147 [4, 10933]    |
| 29 |              | x             |     |       |               |              | x            |              |              |        |                   |             |       | x    |      | 727 [50, 2867]    | 10297 [859, 37559]  | 1690 [114, 5651]   |
| 30 |              | x             |     |       |               |              | x            |              |              |        |                   |             |       |      | x    | 260 [18, 1082]    | 5107 [427, 18789]   | 346 [-11, 2027]    |
| 31 |              |               | x   |       |               |              | x            |              |              |        |                   |             | x     |      |      | 1846 [55, 7972]   | 15018 [838, 59912]  | 1428 [-1213, 6344] |
| 32 |              |               | x   |       |               |              | x            |              |              |        |                   |             |       | x    |      | 1768 [158, 6833]  | 15836 [1828, 55569] | 504 [-272, 2802]   |
| 33 |              |               | x   |       |               |              | x            |              |              |        |                   |             |       |      | x    | 432 [30, 1718]    | 6097 [552, 21097]   | 187 [-96, 1659]    |
| 34 |              |               |     | x     |               |              | x            |              |              |        |                   |             | x     |      |      | 1636 [41, 8401]   | 13040 [652, 58138]  | 1551 [-964, 5924]  |
| 35 |              |               |     | x     |               |              | x            |              |              |        |                   |             |       | x    |      | 1683 [126, 6924]  | 14468 [1306, 52742] | 584 [-212, 2719]   |
| 36 |              |               |     | x     |               |              | x            |              |              |        |                   |             |       |      | x    | 429 [21, 1748]    | 5848 [475, 19915]   | 180 [-134, 1422]   |
| 37 | x            |               |     |       |               |              |              | x            |              |        |                   |             | x     |      |      | 246 [20, 1654]    | 2489 [296, 13447]   | 3135 [11, 11105]   |
| 38 | x            |               |     |       |               |              |              | x            |              |        |                   |             |       | x    |      | 721 [51, 3163]    | 7013 [655, 28443]   | 1674 [114, 5961]   |
| 39 | x            |               |     |       |               |              |              | x            |              |        |                   |             |       |      | x    | 253 [17, 938]     | 3361 [285, 11443]   | 368 [-6, 2327]     |
| 40 |              | x             |     |       |               |              |              | x            |              |        |                   |             | x     |      |      | 244 [19, 1532]    | 2768 [283, 15127]   | 3108 [15, 11030]   |
| 41 |              | x             |     |       |               |              |              | x            |              |        |                   |             |       | x    |      | 706 [54, 3125]    | 7512 [659, 29943]   | 1643 [114, 5907]   |
| 42 |              | x             |     |       |               |              |              | x            |              |        |                   |             |       |      | x    | 255 [16, 991]     | 3462 [295, 12188]   | 361 [-1, 2204]     |
| 43 |              |               | x   |       |               |              |              | x            |              |        |                   |             | x     |      |      | 2860 [63, 10839]  | 20125 [690, 70958]  | 469 [-2730, 4531]  |
| 44 |              |               | x   |       |               |              |              | x            |              |        |                   |             |       | x    |      | 2209 [174, 8049]  | 16090 [1363, 56277] | 185 [-667, 1776]   |
| 45 |              |               | x   |       |               |              |              | x            |              |        |                   |             |       |      | x    | 537 [35, 2219]    | 5439 [426, 18911]   | 80 [-340, 1083]    |
| 46 |              |               |     | x     |               |              |              | x            |              |        |                   |             | x     |      |      | 2034 [57, 9769]   | 14356 [595, 64138]  | 1000 [-1500, 5147] |
| 47 |              |               |     | x     |               |              |              | x            |              |        |                   |             |       | x    |      | 1903 [177, 7341]  | 13959 [1500, 47698] | 392 [-371, 2233]   |
| 48 |              |               |     | x     |               |              |              | x            |              |        |                   |             |       |      | x    | 475 [24, 1993]    | 4949 [342, 16945]   | 130 [-191, 1276]   |
| 49 | x            |               |     |       |               |              |              |              | x            |        |                   |             | x     |      |      | 2708 [84, 11191]  | 12064 [409, 47077]  | 538 [-2866, 4538]  |
| 50 | x            |               |     |       |               |              |              |              | x            |        |                   |             |       | x    |      | 2096 [172, 7775]  | 9375 [772, 33680]   | 211 [-611, 1636]   |
| 51 | x            |               |     |       |               |              |              |              | x            |        |                   |             |       |      | x    | 546 [28, 2453]    | 2516 [147, 10247]   | 72 [-351, 1087]    |
| 52 |              | x             |     |       |               |              |              |              | x            |        |                   |             | x     |      |      | 2737 [88, 10912]  | 11921 [411, 49021]  | 501 [-2404, 4623]  |

|    | Antibiotics* | Antibiotics** | OCV | POUWT | Clusters 100m | Clusters 70m | Clusters 45m | Clusters 30m | Clusters 15m | Random | Entire population | By district | Early | Peak | Late | Clusters targeted | People targeted         | Cases averted     |
|----|--------------|---------------|-----|-------|---------------|--------------|--------------|--------------|--------------|--------|-------------------|-------------|-------|------|------|-------------------|-------------------------|-------------------|
| 53 |              | x             |     |       |               |              |              |              | x            |        |                   |             |       | x    |      | 2094 [176, 7871]  | 9368 [872, 34746]       | 205 [-605, 1739]  |
| 54 |              | x             |     |       |               |              |              |              | x            |        |                   |             |       |      | x    | 554 [30, 2298]    | 2510 [151, 9975]        | 78 [-405, 1143]   |
| 55 |              |               | x   |       |               |              |              |              | x            |        |                   |             | x     |      |      | 3457 [98, 12756]  | 15436 [412, 53544]      | -8 [-3582, 3217]  |
| 56 |              |               | x   |       |               |              |              |              | x            |        |                   |             |       | x    |      | 2424 [188, 8580]  | 10651 [822, 36913]      | -3 [-1056, 1176]  |
| 57 |              |               | x   |       |               |              |              |              | x            |        |                   |             |       |      | x    | 632 [34, 2937]    | 2846 [161, 12352]       | 0 [-706, 698]     |
| 58 |              |               |     | x     |               |              |              |              | x            |        |                   |             | x     |      |      | 3403 [108, 12318] | 15006 [480, 52809]      | 30 [-3292, 3287]  |
| 59 |              |               |     | x     |               |              |              |              | x            |        |                   |             |       | x    |      | 2398 [219, 8483]  | 10383 [995, 37653]      | 35 [-1052, 1148]  |
| 60 |              |               |     | x     |               |              |              |              | x            |        |                   |             |       |      | x    | 657 [34, 2951]    | 2960 [147, 12097]       | -1 [-834, 733]    |
| 61 | x            |               | x   |       | x             |              |              |              |              |        |                   |             | x     |      |      | 94 [11, 328]      | 3957 [843, 10987]       | 3425 [38, 12203]  |
| 62 | x            |               | x   |       | x             |              |              |              |              |        |                   |             |       | x    |      | 332 [33, 1390]    | 10431 [1393, 34495]     | 2076 [153, 7383]  |
| 63 | x            |               | x   |       | x             |              |              |              |              |        |                   |             |       |      | x    | 186 [13, 656]     | 9855 [1042, 30585]      | 439 [9, 2455]     |
| 64 | x            |               |     | x     | x             |              |              |              |              |        |                   |             | x     |      |      | 747 [10, 5139]    | 10908 [976, 46386]      | 2438 [-208, 8552] |
| 65 | x            |               |     | x     | x             |              |              |              |              |        |                   |             |       | x    |      | 1055 [53, 4606]   | 16385 [1980, 57266]     | 1307 [64, 4481]   |
| 66 | x            |               |     | x     | x             |              |              |              |              |        |                   |             |       |      | x    | 261 [15, 1095]    | 10710 [1189, 33937]     | 359 [-15, 2076]   |
| 67 |              |               | x   | x     | x             |              |              |              |              |        |                   |             | x     |      |      | 122 [20, 380]     | 4217 [981, 11607]       | 3358 [34, 12132]  |
| 68 |              |               | x   | x     | x             |              |              |              |              |        |                   |             |       | x    |      | 453 [42, 1887]    | 11147 [1539, 37172]     | 1991 [152, 7046]  |
| 69 |              |               | x   | x     | x             |              |              |              |              |        |                   |             |       |      | x    | 240 [19, 882]     | 10432 [1247, 32787]     | 386 [0, 2293]     |
| 70 | x            |               | x   | x     | x             |              |              |              |              |        |                   |             | x     |      |      | 77 [12, 245]      | 3573 [897, 9838]        | 3422 [41, 12197]  |
| 71 | x            |               | x   | x     | x             |              |              |              |              |        |                   |             |       | x    |      | 287 [32, 1209]    | 9531 [1428, 32858]      | 2120 [169, 7613]  |
| 72 | x            |               | x   | x     | x             |              |              |              |              |        |                   |             |       |      | x    | 167 [12, 614]     | 9570 [1009, 30049]      | 454 [9, 2510]     |
| 73 |              |               | x   |       |               |              |              |              |              |        | x                 |             | x     |      |      | -                 | 695445 [695445, 695445] | 3279 [-2, 11890]  |
| 74 |              |               | x   |       |               |              |              |              |              |        | x                 |             |       | x    |      | -                 | 695445 [695445, 695445] | 1653 [105, 5904]  |
| 75 |              |               | x   |       |               |              |              |              |              |        | x                 |             |       |      | x    | -                 | 695445 [695445, 695445] | 291 [-24, 2021]   |
| 76 |              |               |     | x     |               |              |              |              |              |        | x                 |             | x     |      |      | -                 | 695445 [695445, 695445] | 1588 [-893, 6371] |
| 77 |              |               |     | x     |               |              |              |              |              |        | x                 |             |       | x    |      | -                 | 695445 [695445, 695445] | 577 [-218, 2688]  |
| 78 |              |               |     | x     |               |              |              |              |              |        | x                 |             |       |      | x    | -                 | 695445 [695445, 695445] | 141 [-198, 1378]  |

|     | Antibiotics* | Antibiotics** | OCV | POUWT | Clusters 100m | Clusters 70m | Clusters 45m | Clusters 30m | Clusters 15m | Random | Entire population | By district | Early | Peak | Late | Clusters targeted | People targeted        | Cases averted      |
|-----|--------------|---------------|-----|-------|---------------|--------------|--------------|--------------|--------------|--------|-------------------|-------------|-------|------|------|-------------------|------------------------|--------------------|
| 79  |              |               | x   |       |               |              |              |              |              |        |                   | x           | x     |      |      | -                 | 183180 [89966, 338855] | 2496 [-374, 9000]  |
| 80  |              |               | x   |       |               |              |              |              |              |        |                   | x           |       | x    |      | -                 | 185556 [89966, 338855] | 1374 [75, 4282]    |
| 81  |              |               | x   |       |               |              |              |              |              |        |                   | x           |       |      | x    | -                 | 164586 [89966, 338855] | 217 [-67, 1535]    |
| 82  |              |               |     | x     |               |              |              |              |              |        |                   | x           | x     |      |      | -                 | 183180 [89966, 338855] | 1165 [-1718, 5410] |
| 83  |              |               |     | x     |               |              |              |              |              |        |                   | x           |       | x    |      | -                 | 185556 [89966, 338855] | 446 [-373, 2099]   |
| 84  |              |               |     | x     |               |              |              |              |              |        |                   | x           |       |      | x    | -                 | 164586 [89966, 338855] | 107 [-307, 1174]   |
| 85  |              |               | x   | x     |               |              |              |              |              |        |                   | x           | x     |      |      | -                 | 183180 [89966, 338855] | 2545 [-277, 9572]  |
| 86  |              |               | x   | x     |               |              |              |              |              |        |                   | x           |       | x    |      | -                 | 185556 [89966, 338855] | 1437 [94, 4571]    |
| 87  |              |               | x   | x     |               |              |              |              |              |        |                   | x           |       |      | x    | -                 | 164586 [89966, 338855] | 250 [-85, 1684]    |
| 88  | x*           |               | x   |       | x             |              |              |              | x            |        |                   |             | x     |      |      | 159 [21, 532]     | 4908 [1031, 13116]     | 3315 [14, 11893]   |
| 89  | x*           |               | x   |       | x             |              |              |              | x            |        |                   |             |       | x    |      | 560 [51, 2395]    | 12796 [1736, 43734]    | 1808 [118, 6505]   |
| 90  | x*           |               | x   |       | x             |              |              |              | x            |        |                   |             |       |      | x    | 266 [21, 964]     | 10928 [1202, 33704]    | 340 [-4, 2282]     |
| 91  | x*           |               | x   |       |               | x            |              |              | x            |        |                   |             | x     |      |      | 309 [25, 1866]    | 5751 [855, 22897]      | 3036 [-8, 10748]   |
| 92  | x*           |               | x   |       |               | x            |              |              | x            |        |                   |             |       | x    |      | 902 [79, 4319]    | 13280 [1664, 51063]    | 1366 [69, 5347]    |
| 93  | x*           |               | x   |       |               | x            |              |              | x            |        |                   |             |       |      | x    | 296 [22, 1111]    | 8052 [825, 25865]      | 317 [-12, 2112]    |
| 94  | x*           |               | x   |       |               |              | x            |              | x            |        |                   |             | x     |      |      | 1692 [58, 8145]   | 14440 [684, 60945]     | 1490 [-1160, 6348] |
| 95  | x*           |               | x   |       |               |              | x            |              | x            |        |                   |             |       | x    |      | 1694 [145, 6883]  | 15321 [1419, 55727]    | 547 [-209, 2768]   |
| 96  | x*           |               | x   |       |               |              | x            |              | x            |        |                   |             |       |      | x    | 420 [20, 1668]    | 6152 [432, 19921]      | 192 [-77, 1662]    |
| 97  | x*           |               | x   |       |               |              |              | x            | x            |        |                   |             | x     |      |      | 2603 [69, 10724]  | 18356 [718, 69874]     | 632 [-2455, 4276]  |
| 98  | x*           |               | x   |       |               |              |              | x            | x            |        |                   |             |       | x    |      | 2095 [170, 7662]  | 15603 [1503, 54376]    | 233 [-516, 1716]   |
| 99  | x*           |               | x   |       |               |              |              | x            | x            |        |                   |             |       |      | x    | 498 [24, 2301]    | 5188 [379, 19053]      | 92 [-264, 1221]    |
| 100 | x            |               |     |       |               |              |              |              |              | x      |                   |             | x     |      |      | -                 | 23987 [1109, 85818]    | 45 [-3509, 3616]   |
| 101 | x            |               |     |       |               |              |              |              |              | x      |                   |             |       | x    |      | -                 | 22477 [2539, 73165]    | 31 [-1047, 1131]   |
| 102 | x            |               |     |       |               |              |              |              |              | x      |                   |             |       |      | x    | -                 | 12735 [1288, 41564]    | 0 [-837, 699]      |
| 103 |              | x             |     |       |               |              |              |              |              | x      |                   |             | x     |      |      | -                 | 32027 [1501, 140503]   | 8 [-3398, 3346]    |
| 104 |              | x             |     |       |               |              |              |              |              | x      |                   |             |       | x    |      | -                 | 34596 [2479, 126474]   | 41 [-1094, 1282]   |

|     | Antibiotics* | Antibiotics** | OCV | POUWT | Clusters 100m | Clusters 70m | Clusters 45m | Clusters 30m | Clusters 15m | Random | Entire population | By district | Early | Peak | Late | Clusters targeted | People targeted     | Cases averted     |
|-----|--------------|---------------|-----|-------|---------------|--------------|--------------|--------------|--------------|--------|-------------------|-------------|-------|------|------|-------------------|---------------------|-------------------|
| 105 |              | x             |     |       |               |              |              |              |              | x      |                   |             |       |      | x    | -                 | 14760 [1248, 51802] | 6 [-748, 629]     |
| 106 |              |               | x   |       |               |              |              |              |              | x      |                   |             | x     |      |      | -                 | 5044 [1083, 13489]  | 152 [-3754, 3730] |
| 107 |              |               | x   |       |               |              |              |              |              | x      |                   |             |       | x    |      | -                 | 12862 [1915, 43188] | 99 [-845, 1230]   |
| 108 |              |               | x   |       |               |              |              |              |              | x      |                   |             |       |      | x    | -                 | 11064 [1291, 33596] | 17 [-660, 821]    |
| 109 |              |               |     | x     |               |              |              |              |              | x      |                   |             | x     |      |      | -                 | 14263 [1200, 57750] | 47 [-3417, 3558]  |
| 110 |              |               |     | x     |               |              |              |              |              | x      |                   |             |       | x    |      | -                 | 19632 [2590, 64664] | 38 [-898, 1192]   |
| 111 |              |               |     | x     |               |              |              |              |              | x      |                   |             |       |      | x    | -                 | 12249 [1267, 37495] | 2 [-650, 683]     |
